# Supplementary material
Source: PubMed Central journal article supplement (PMC5904311)
Supplement: rspb20172786supp2.pdf [file rspb20172786supp2.pdf]

(a) Costa Rica

| Month<br>(2015-2016) | Collected/sighted<br><i>A. iphichus</i> | Collected/sighted<br><i>A. serpa</i> | Trapped<br><i>A. iphichus</i> | Trapped<br><i>A. serpa</i> | Total<br><i>A. iphichus</i> | Total<br><i>A. serpa</i> |
|----------------------|-----------------------------------------|--------------------------------------|-------------------------------|----------------------------|-----------------------------|--------------------------|
| March                | 0                                       | 5                                    | 0                             | 0                          | 0                           | 5                        |
| April                | 0                                       | 0                                    | 0                             | 0                          | 0                           | 0                        |
| May                  | 2                                       | 1                                    | 4                             | 0                          | 6                           | 1                        |
| June                 | 12                                      | 2                                    | 2                             | 0                          | 14                          | 2                        |
| July                 | 3                                       | 1                                    | 4                             | 0                          | 7                           | 1                        |
| August               | 0                                       | 1                                    | 0                             | 0                          | 0                           | 1                        |
| September            | 0                                       | 0                                    | 2                             | 0                          | 2                           | 0                        |
| October              | 0                                       | 0                                    | 0                             | 0                          | 0                           | 0                        |
| November             | 0                                       | 0                                    | 0                             | 0                          | 0                           | 0                        |
| December             | 0                                       | 0                                    | 0                             | 0                          | 0                           | 0                        |
| January              | 1                                       | 6                                    | 0                             | 0                          | 1                           | 6                        |
| February             | 0                                       | 3                                    | 0                             | 0                          | 0                           | 3                        |
| March                | 0                                       | 3                                    | 0                             | 0                          | 0                           | 3                        |
| April                | 0                                       | 0                                    | 0                             | 0                          | 0                           | 0                        |
| May                  | 0                                       | 0                                    | 0                             | 0                          | 0                           | 0                        |
| June                 | 0                                       | 0                                    | 1                             | 0                          | 1                           | 0                        |
| July                 | 0                                       | 0                                    | 2                             | 0                          | 2                           | 0                        |
| August               | 0                                       | 0                                    | 3                             | 0                          | 3                           | 0                        |
| <b>Total</b>         | <b>18</b>                               | <b>22</b>                            | <b>18</b>                     | <b>0</b>                   | <b>36</b>                   | <b>22</b>                |

(NS)

(b) Ecuador

| Month<br>(2015-2017) | Collected/sighted<br><i>A. iphichlus</i> | Collected/sighted<br><i>A. serpa</i> | Trapped<br><i>A. iphichlus</i> | Trapped<br><i>A. serpa</i> | Total<br><i>A. iphichlus</i> | Total<br><i>A. serpa</i> |
|----------------------|------------------------------------------|--------------------------------------|--------------------------------|----------------------------|------------------------------|--------------------------|
| July                 | 1                                        | 0                                    | 1                              | 0                          | 2                            | 0                        |
| August               | 7                                        | 0                                    | 0                              | 0                          | 7                            | 0                        |
| September            | 1                                        | 0                                    | 2                              | 0                          | 3                            | 0                        |
| October              | 6                                        | 0                                    | 1                              | 0                          | 7                            | 0                        |
| November             | -                                        | -                                    | 0                              | 0                          | 0                            | 0                        |
| December             | -                                        | -                                    | 2                              | 0                          | 2                            | 0                        |
| January              | -                                        | -                                    | 3                              | 0                          | 3                            | 0                        |
| February             | -                                        | -                                    | 0                              | 0                          | 0                            | 0                        |
| March                | -                                        | -                                    | 0                              | 0                          | 0                            | 0                        |
| April                | -                                        | -                                    | 0                              | 0                          | 0                            | 0                        |
| May                  | -                                        | -                                    | 1                              | 0                          | 1                            | 0                        |
| June                 | -                                        | -                                    | 3                              | 0                          | 3                            | 0                        |
| July                 | -                                        | -                                    | 7                              | 0                          | 7                            | 0                        |
| August               | -                                        | -                                    | 4                              | 0                          | 4                            | 0                        |
| September            | -                                        | -                                    | 6                              | 1                          | 6                            | 1                        |
| October              | -                                        | -                                    | 9                              | 0                          | 9                            | 0                        |
| November             | -                                        | -                                    | 19                             | 0                          | 19                           | 0                        |
| December             | -                                        | -                                    | 5                              | 0                          | 5                            | 0                        |
| January              | -                                        | -                                    | 0                              | 0                          | 0                            | 0                        |
| February             | -                                        | -                                    | 5                              | 0                          | 5                            | 0                        |
| March                | -                                        | -                                    | 1                              | 0                          | 1                            | 0                        |
| April                | -                                        | -                                    | 0                              | 0                          | 0                            | 0                        |
| <b>Total</b>         | <b>15</b>                                | <b>0</b>                             | <b>69</b>                      | <b>1</b>                   | <b>84</b>                    | <b>1</b>                 |

( $p = 0.00047$ )

**Supporting Information Table 2:** Observed adult records of *A. iphichlus* (model) and *A. serpa* (mimic) at two field locations: (a) Costa Rica and (b) Ecuador. Shaded rows indicate months when adult records overlap with data collected during predation experiments. The total abundances were compared using a two-tailed Wilcoxon signed-rank test, and means were derived from monthly records. The abundance of *A. iphichlus* and *A. serpa* was not significantly different in Costa Rica (*NS*, brackets), but in Ecuador *A. iphichlus* (model) is significantly more abundant than *A. serpa* (mimic) ( $p = 0.00047$ , brackets).
