# Supplementary material
Source: PubMed Central journal article supplement (PMC5904311)
Supplement: rspb20172786supp4.pdf [file rspb20172786supp4.pdf]

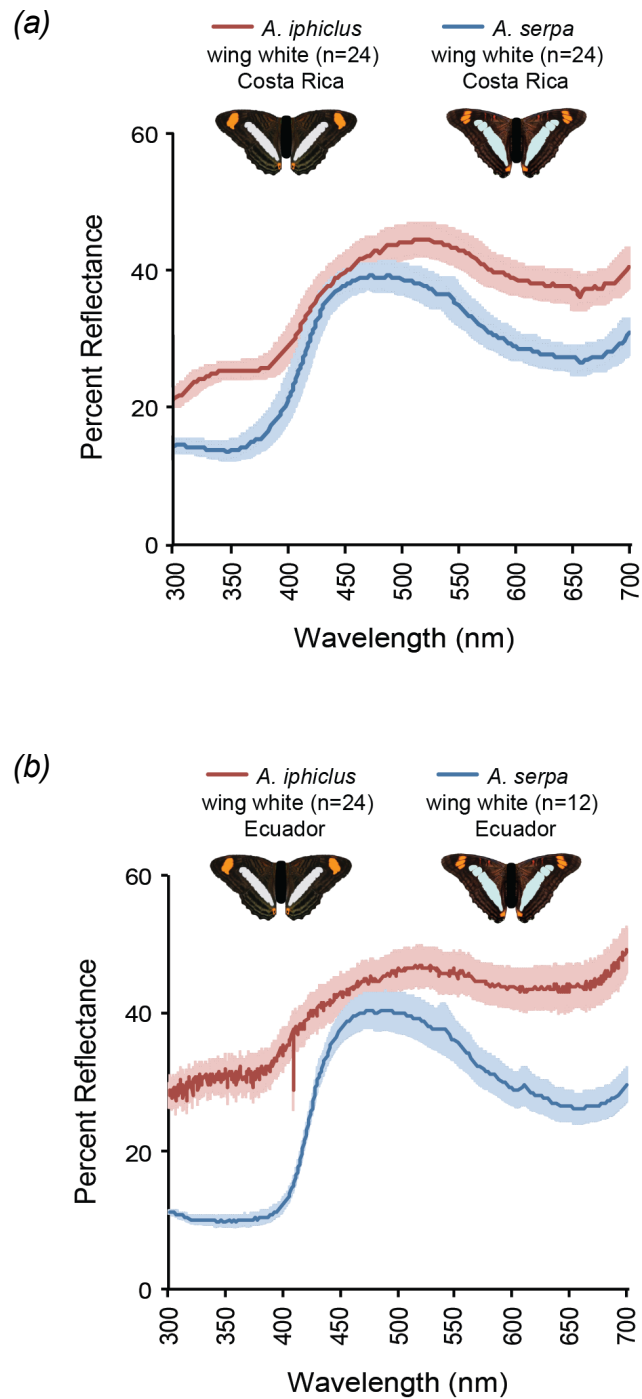

**Supporting Information Figure 2:** Reflectance spectra of *Adelpha iphicles* (model) and *Adelpha serpa* (mimic) white wing bands from (a) Costa Rica and (b) Ecuador. Shown are mean values with 95% confidence intervals (shaded). *Adelpha iphicles* is brighter overall (including in UV), and *A. serpa* has more relative blue reflectance compared to *A. iphicles*. Figure (a) reproduced with permission from Finkbeiner et al. 2017 [19].
