# Supplementary material
Source: PubMed Central journal article supplement (PMC5904311)

(a) *Adelpha iphiclus* reflectance spectra – Costa Rica

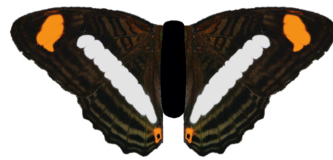

*A. iphiclus* white

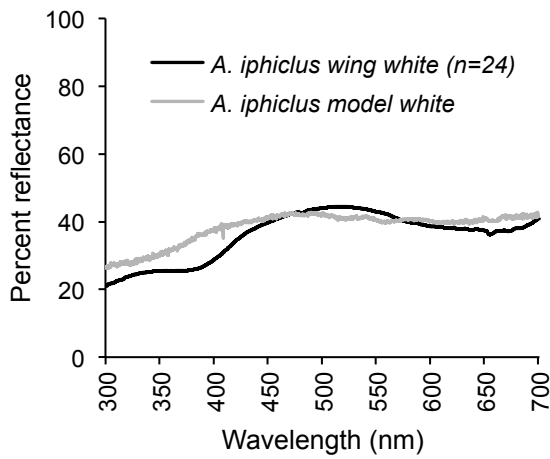

*A. iphiclus* forewing orange patch

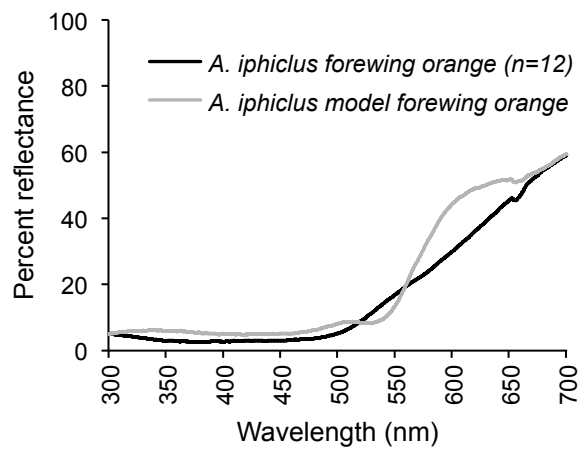

*A. iphiclus* brown

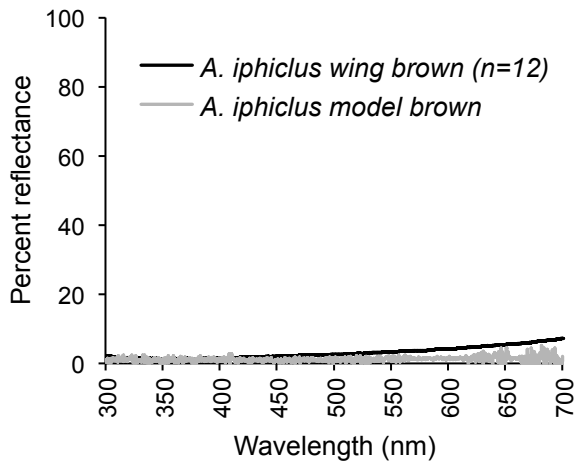

*A. iphiclus* hindwing orange patch

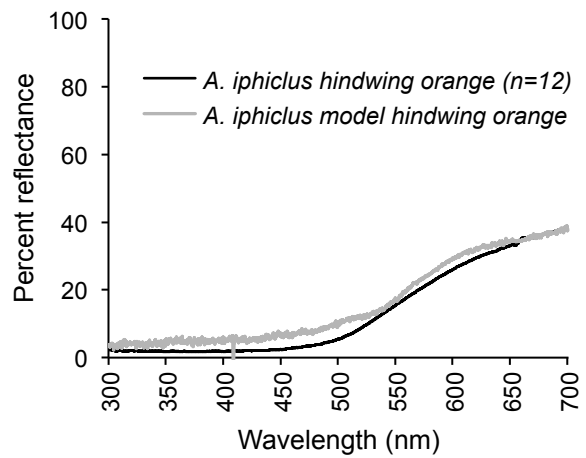

(b) *Adelpha serpa* reflectance spectra – Costa Rica

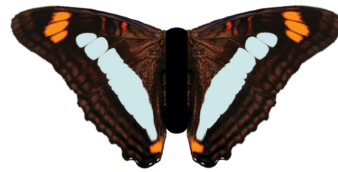

*A. serpa* white

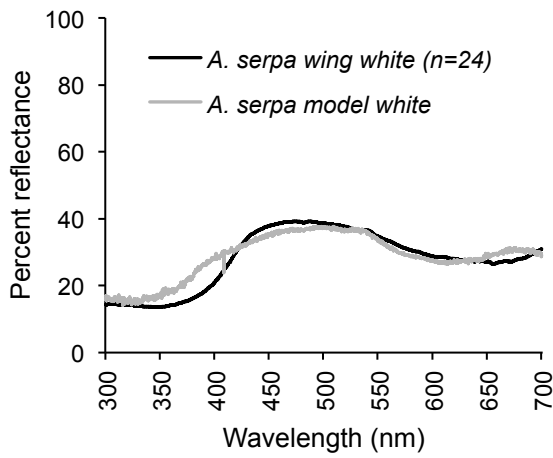

*A. serpa* forewing orange patch

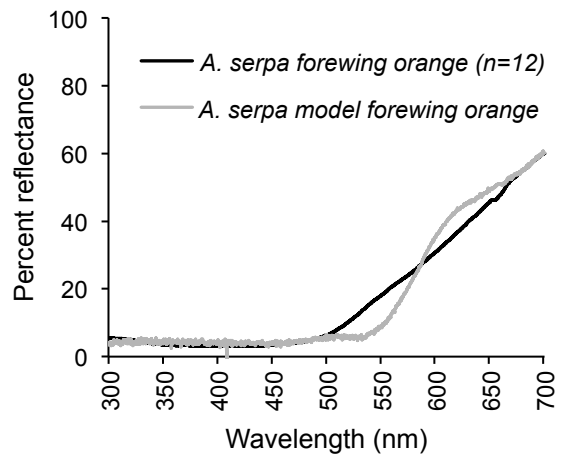

*A. serpa* brown

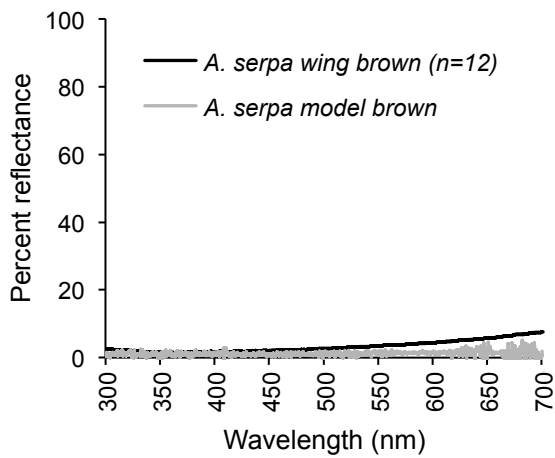

*A. serpa* hindwing orange patch

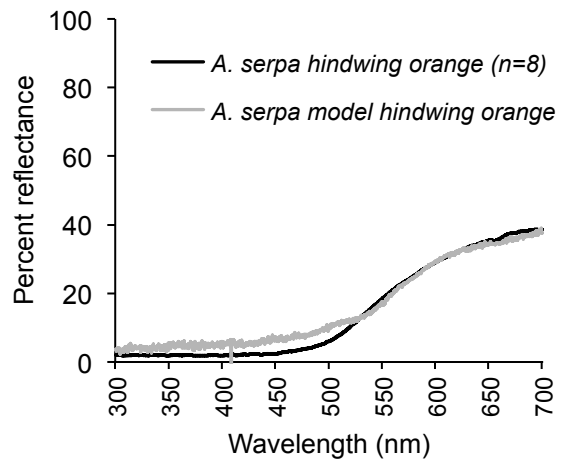

Supplement: rspb20172786supp5.pdf [file rspb20172786supp5.pdf]
